# Supplementary material for: Molecular portrait of high alpha-fetoprotein in hepatocellular carcinoma: implications for biomarker-driven clinical trials
Source: PubMed Central journal article supplement (PMC6738090; doi:10.1038/s41416-019-0513-7), 2019-07-09

# Supplementary Material

## Supplementary Methods

### *Patients and samples*

The internal cohort HEPTROMIC included samples from 244 surgically resected HCC obtained upon institutional review board approval from two institutions of the HCC Genomic Consortium (IRCCS Istituto Nazionale Tumori (Milan, Italy; n=217) and Hospital Clínic (Barcelona, Spain; n=27). Patients provided written informed consent. The study was conducted in accordance with the Declaration of Helsinki. All samples included in this study were fresh-frozen. For RNA and DNA extraction, we used the Qiagen RNeasy Mini (500 ng of total RNA at a concentration of 100 ng/uL; Qiagen, Hilden, Germany) and Invitrogen Charge Switch genomic DNA Mini Tissue (1 mg of total DNA at a concentration of 100 ng/uL; Invitrogen, Carlsbad, CA) kits, respectively. Median sample storage time from collection to DNA/RNA extraction was 7 years.

The external publicly available cohort included 276 surgically resected primary HCCs from The Cancer Genome Atlas (<https://gdc.cancer.gov>; <http://www.cbioportal.org>)<sup>1</sup>.

### *Analysis of whole-genome expression*

For samples belonging to the Heptromic cohort, RNA profiling was conducted in 224 HCC and 168 nontumor liver adjacent cirrhotic tissues using the Affymetrix Human Genome U219 Array Plate (Affymetrix, Inc., Santa Clara, CA), which is able to interrogate more than 20,000 mapped genes. Processing of transcriptome data (i.e., normalization, background correction, and filtering) was conducted as previously reported<sup>2</sup>. Data is stored in the Gene Expression Omnibus (GEO) repository (GSE63898)<sup>3</sup>. For the TCGA dataset<sup>1</sup>, RNA sequencing data were already available from 270 HCC and promptly downloaded from <http://www.cBioportal.org>.

Prediction of liver cancer mRNA-based signatures was performed using the nearest template prediction method, as implemented in the specific module of Gene Pattern software<sup>4</sup>. All mRNA signatures analyzed were already reported<sup>2,5-14</sup>, being deposited in the Molecular Signature Database ([www.broadinstitute.org/gsea/msigdb](http://www.broadinstitute.org/gsea/msigdb)). To analyze KEGG VEGF pathway we used the single sample Gene Set Enrichment Analysis (ssGSEA), as implemented in Gene Pattern software<sup>15</sup>.

### ***Technical validation of gene expression by RT-PCR***

We technically validated microarray-derived *AFP* RNA expression levels with quantitative RT-PCR in 213 tumors and 151 matched non-tumor adjacent tissue from the HEPTROMIC cohort. The high correlation obtained ( $R=0.841$ ,  $p<0.001$ ) indicated a clear overlap between both techniques. Likewise, we also validated *VEGFA*, *VEGFB* and *VEGFC* expression by RT-PCR (*VEGFA*:  $R=0.531$ ,  $p<0.001$ ; *VEGFB*:  $R=0.755$ ,  $p<0.001$ ; *VEGFC*:  $R=0.538$ ,  $p<0.001$ ). For relative mRNA quantification, TaqMan® Gene Expression Assays were used following the manufacturer's instructions (Applied Biosystems). TaqMan® probes used were human *AFP* (Hs01040598\_m1), *VEGFA* (Hs00900055\_m1), *VEGFB* (Hs00173634\_m1) and *VEGFC* (Hs01099203\_m1). Ribosomal RNA (18S) was chosen as the endogenous reference gene (Hs99999901\_s1).

### ***Analysis of DNA methylation***

Methylome profiling was performed in 222 samples from the HEPTROMIC cohort with the Illumina Infinium HumanMethylation450 BeadChip array (Illumina, Inc., San Diego, CA) that interrogates more than 485,000 cytosine-phosphate-guanine (CpG) sites covering 96% of known CpG islands<sup>16</sup>. Data has been previously deposited in the Gene Expression Omnibus (GEO) repository (GSE56588)<sup>3</sup>. DNA methylation data from the TCGA cohort<sup>1</sup> (276 HCC) were downloaded from <http://www.cBioportal.org>.

To study differential methylation between AFP high and low HCCs, probes containing single-nucleotide polymorphisms (SNPs) or located on sex chromosomes were eliminated, leaving 434,728 probes for analysis. The  $\beta$  value is used to estimate the methylation level of the CpG locus using the ratio of intensities between methylated and unmethylated alleles.

### ***Technical validation of DNA methylation by pyrosequencing***

To ensure reproducibility of the methylation status of the AFP probe located in TSS1500 (cg10778295) and significantly associated with AFP expression, we performed technical validation by pyrosequencing in a subset of 20 HCCs from the HEPTROMIC cohort ( $R=0.96$ ;  $p<0.001$ ).

We randomly selected 10 samples with  $\beta$  value  $<0.74$  and 10 samples with  $\beta$  value  $>0.94$  in cg10778295 according to HumanMethylation450 BeadChip array. A minimum of 500ng of DNA was converted using the EZ DNA Methylation-Gold (Zymo Research Corporation, Irvine, CA) bisulfite conversion kit, following the manufacturer's recommendations. Specific sets of primers for polymerase chain reaction (PCR) amplification and sequencing were designed using specific software (PyroMark assay design, version 2.0.01.15). Primer sequences were designed, when possible, to hybridize with CpG-free sites to ensure methylation-independent amplification. PCR was performed under standard conditions with biotinylated primers, and the PyroMark Vacuum Prep Tool (Biotage AB, Uppsala, Sweden) was used to prepare single-stranded PCR products, according to the manufacturer's instructions. PCR products were observed at 2% agarose gels before pyrosequencing. Reactions were performed in a PyroMark Q96 System (version 2.0.6; Qiagen) using appropriate reagents and protocols.

Moreover, we assessed the methylation levels of the previous (chr4:74,300,504-74,300,505) and next (chr4:74,301,307-74,301,308) CpGs within the AFP promoter confirming the inverse correlation between DNA methylation and expression ( $R=-0.58$ ,  $p=0.012$ ;  $R=-0.44$ ;  $p=0.061$ ).

### ***Analysis of whole-exome sequencing***

Whole-exome sequencing was performed in 49 pairs of samples from the HEPTROMIC cohort in the setting of a collaborative project that included a total of 243 liver tumors<sup>17</sup>. Sequence capture, enrichment and elution of genomic DNA were performed by IntegraGen as previously described<sup>18</sup>. Agilent in-solution enrichment was used with the manufacturer's biotinylated oligonucleotide probe library (SureSelect Human All Exon kit v2-46Mb [n = 36 pairs], v3-52Mb [n = 7 pairs], v4-70Mb [n = 56 pairs] or v5+UTRs-75Mb [n = 144 pairs], Agilent Technologies) according to the manufacturer's instructions. The eluted enriched DNA sample was sequenced on an Illumina HiSeq 2000 sequencer as paired-end 75-base reads. Image analysis and base calling were performed using Illumina Real-Time Analysis (RTA) Pipeline v1.12 with default parameters. Whole-exome sequencing pre-analysis was based on the Illumina pipeline (CASAVA1.8.2). Only the positions included in the bait coordinates were conserved. Each sample was sequenced to an average depth of 72.0x, with ~96.9% of the targeted regions covered by 1x, ~92.6% covered by 10x and ~82.9% covered by 25x. A list of variants was generated considering only somatic mutations in coding regions plus consensus intronic bases (missense, nonsense, splice-site, indel and synonymous mutations). Polymorphisms referenced in dbSNP135 or the 1000 Genomes Project with a minor allele frequency over 2% were removed. Functional evidence of predictive drastic consequences for the variants was investigated using PolyPhen-2 v2.2.2. A total of 11,823 (41%) putative somatic mutations were validated manually using the Integrated Genomics Viewer (IGV), and 3,126 (11%) were validated using Sanger sequencing<sup>17</sup>. Mutations were annotated using Alamut Batch, Alamut Visual v2.4 (Interactive Biosoftware) and Oncotator. All sequences were deposited in the EGA database (accessions EGAS00001000217, EGAS00001000679 and EGAS00001001002) and the ICGC data portal. DNA exome sequencing of the TCGA cohort<sup>1</sup> (274 HCC) was downloaded from <http://www.cBioportal.org>. The analysis of differentially mutated genes between AFP high and low tumors was based on non-silent point mutations identified in

both HEPTROMIC and TCGA cohorts, excluding one hypermutated sample from the TCGA (TCGA-UB-A7MB).

### ***Statistical analysis***

Correlations between molecular classes and clinical-pathological variables were analyzed by Fisher's exact test and T-test for categorical and continuous data, respectively. Correlations between two continuous data were analyzed by Pearson's correlation coefficient (R). Kaplan-Meier estimates and log-rank test were performed to analyze survival data. Overall survival was defined as the time between surgical resection and death of any cause or lost follow-up. All reported p values are two sided and  $p < 0.05$  was considered significant.

All analyses were performed according to the "REporting recommendations for tumour MARKer prognostic studies" (REMARK Guidelines)<sup>19</sup>. The R software environment (<http://www.r-project.org/>) using RStudio ([www.rstudio.com](http://www.rstudio.com)) and IBM SPSS version 23 (<http://www.ibm.com/>) were used for all analyses.

### ***References***

1. Ally A, Balasundaram M, Carlsen R, Chuah E, Clarke A, Dhalla N, et al. Comprehensive and Integrative Genomic Characterization of Hepatocellular Carcinoma. *Cell*. 2017;169(7):1327–1341.e23.
2. Villanueva A, Hoshida Y, Battiston C, Tovar V, Sia D, Alsinet C, et al. Combining clinical, pathology, and gene expression data to predict recurrence of hepatocellular carcinoma. *Gastroenterology*. 2011;140(5):1501–12.
3. Villanueva A, Portela A, Sayols S, Battiston C, Hoshida Y, Méndez-González J, et al. DNA methylation-based prognosis and epdrivers in hepatocellular carcinoma. *Hepatology*. 2015;61(6):1945–56.

4. Hoshida Y. Nearest template prediction: A single-sample-based flexible class prediction with confidence assessment. *PLoS One*. 2010;5(11):1–8.
5. Bollard J, Miguela V, Ruiz de Galarreta M, Venkatesh A, Bian CB, Roberto MP, et al. Palbociclib (PD-0332991), a selective CDK4/6 inhibitor, restricts tumour growth in preclinical models of hepatocellular carcinoma. *Gut*. 2016;gutjnl-2016-312268.
6. Chiang DY, Villanueva A, Hoshida Y, Peix J, Newell P, Minguez B, et al. Focal gains of VEGFA and molecular classification of hepatocellular carcinoma. *Cancer Res*. 2008;68(16):6779–88.
7. Sia D, Jiao Y, Martinez-Quetglas I, Kuchuk O, Villacorta-Martin C, Castro de Moura M, et al. Identification of an Immune-specific Class of Hepatocellular Carcinoma, Based on Molecular Features. *Gastroenterology*. 2017;153(3):812–26.
8. Hoshida Y, Nijman SMB, Kobayashi M, Chan JA, Brunet J-P, Chiang DY, et al. Integrative transcriptome analysis reveals common molecular subclasses of human hepatocellular carcinoma. *Cancer Res*. 2009 Sep 15;69(18):7385–92.
9. Boyault S, Rickman DS, de Reyniès A, Balabaud C, Rebouissou S, Jeannot E, et al. Transcriptome classification of HCC is related to gene alterations and to new therapeutic targets. *Hepatology*. 2007 Jan;45(1):42–52.
10. Cairo S, Armengol C, De Reyniès A, Wei Y, Thomas E, Renard C-A, et al. Hepatic stem-like phenotype and interplay of Wnt/beta-catenin and Myc signaling in aggressive childhood liver cancer. *Cancer Cell*. 2008 Dec;14(6):471–84.
11. Yamashita T, Forgues M, Wang W, Kim JW, Ye Q, Jia H, et al. EpCAM and alpha-fetoprotein expression defines novel prognostic subtypes of hepatocellular carcinoma. *Cancer Res*. 2008 Mar 1;68(5):1451–61.
12. Tovar V, Alsinet C, Villanueva A, Hoshida Y, Chiang DY, Solé M, et al. IGF activation in a

- molecular subclass of hepatocellular carcinoma and pre-clinical efficacy of IGF-1R blockage. *J Hepatol.* 2010/03/09. 2010 Apr;52(4):550–9.
13. Villanueva A, Alsinet C, Yanger K, Hoshida Y, Zong Y, Toffanin S, et al. Notch signaling is activated in human hepatocellular carcinoma and induces tumor formation in mice. *Gastroenterology.* 2012 Dec;143(6):1660–1669.e7.
  14. Villanueva A, Chiang DY, Newell P, Peix J, Thung S, Alsinet C, et al. Pivotal Role of mTOR Signaling in Hepatocellular Carcinoma. *Gastroenterology.* 2008;135(6):1972–83.
  15. Subramanian A, Tamayo P, Mootha VK, Mukherjee S, Ebert BL, Gillette MA, et al. Gene set enrichment analysis: a knowledge-based approach for interpreting genome-wide expression profiles. *Proc Natl Acad Sci U S A.* 2005 Oct 25;102(43):15545–50.
  16. Sandoval J, Heyn HA, Moran S, Serra-Musach J, Pujana MA, Bibikova M, et al. Validation of a DNA methylation microarray for 450,000 CpG sites in the human genome. *Epigenetics.* 2011;6(6):692–702.
  17. Schulze K, Imbeaud S, Letouzé E, Alexandrov LB, Calderaro J, Rebouissou S, et al. Exome sequencing of hepatocellular carcinomas identifies new mutational signatures and potential therapeutic targets. *Nat Genet.* 2015;47(5).
  18. Guichard C, Amaddeo G, Imbeaud S, Ladeiro Y, Pelletier L, Maad I Ben, et al. Integrated analysis of somatic mutations and focal copy-number changes identifies key genes and pathways in hepatocellular carcinoma. *Nat Genet.* 2012 Jun;44(6):694–8.
  19. McShane LM, Altman DG, Sauerbrei W, Taube SE, Gion M, Clark GM. REporting recommendations for tumor MARKer prognostic studies (REMARK). *Eur J Cancer.* 2005;41:1690–6.

## Supplementary Tables

**Supplementary Table 1.** Baseline characteristics of patients according to AFP levels (HEPTROMIC).

**Supplementary Table 2.** Baseline characteristics of patients according to AFP levels (TCGA).

**Supplementary Table 3.** Top genes with the highest inverse correlation between its RNA expression and AFP promoter methylation.

**Supplementary Table 4.** Protein coding genes with significantly more/less non-silent mutations depending on AFP.

**Supplementary Table 5.** Protein coding genes differentially expressed between AFP high and low tumors (FDR<0.05 and FC>2).

## Supplementary Figures

**Supplementary Figure 1.** Flow chart of the study.

A total of 520 HCC samples were used in this study, including an internal cohort (HEPTROMIC) of 244 HCCs and an external cohort (TCGA) of 276 HCCs.

**Supplementary Figure 2.** Aberrant overexpression of AFP in HCC.

- A) Logarithmic distribution of AFP serum concentration in the HEPTROMIC cohort, with a long tail of patients (12%; 29/244) with levels greater than 400ng/ml.
- B) Box-plot representation of the differential *AFP* RNA expression between tumor and paired non-tumor adjacent tissue in the HEPTROMIC cohort. Y axis shows fold change between tumor and non-tumor tissue measured by RT-PCR, showing an aberrant expression (median FC=40) of the gene in those patients with AFP>400ng/ml.



- C) Kaplan-Meier curve showing a decreased OS in those patients with AFP>400ng/ml in the HEPTROMIC cohort (median 20.9 vs 66.5 months).
- D) Box-plot representation of the differential methylation (TSS1500) of AFP promoter between tumor and non-tumor adjacent tissue in the HEPTROMIC cohort according to AFP serum levels. The graph shows a significant hypomethylation in patients with AFP>400ng/ml when compared with AFP≤400 and non-tumor adjacent tissue.

**Supplementary Figure 3. AFP high HCCs show a distinct molecular profile (HEPTROMIC).**

- A) Heatmap showing the most relevant molecular features of AFP high tumors (>400ng/ml) in comparison to AFP low tumors in the HEPTROMIC cohort. AFP high HCCs show higher *AFP* RNA expression and AFP promoter (TSS1500) hypomethylation. In terms of somatic alterations, AFP high tumors are associated with less *CTNNB1* mutations and higher rate of *BAP1* mutations (non-significant trend). High AFP tumors are predicted to belong to the proliferation (Chiang) and S2 (Hoshida) classes and show a significant enrichment of signatures of HCC with progenitor features (G1 Boyault, Hepatoblastoma Cairo and CK19 Villanueva). Finally, AFP high tumors present overexpression of HCC signaling pathways (IGF1R Tovar, RB1 loss of function Bollard, NOTCH Villanueva and mTOR Villanueva).
- B) Heatmap representation of the VEGF KEGG pathway activation (inferred by single sample Gene Set Enrichment Analysis) and VEGF ligands RNA expression according to AFP serum concentration in the HEPTROMIC cohort. AFP high tumors show overexpression of VEGFB and PGF with a non-significant higher enrichment in VEGF signaling. The mean values of each phenotype (AFP high and low) have been normalized and represented as Z score.

**Supplementary Table 1. Baseline characteristics of patients according to AFP levels (HEPTROMIC).**

|                                           | AFP serum concentration |                |         |
|-------------------------------------------|-------------------------|----------------|---------|
|                                           | ≤400ng/ml               | >400ng/ml      |         |
|                                           | n=215                   | n=29           |         |
| <b>Origin, n (%)</b>                      |                         |                |         |
| Milan                                     | 190 (87.6)              | 27 (12.4)      |         |
| Barcelona                                 | 25 (92.6)               | 2 (7.8)        |         |
| <b>Gender, n (%)</b>                      |                         |                |         |
| Male                                      | 173 (89.2)              | 21 (10.8)      |         |
| Female                                    | 42 (84.0)               | 8 (16.0)       |         |
| <b>Age (years), median (range)</b>        |                         |                |         |
|                                           | 66 (17-83)              | 66 (47-79)     |         |
| <b>Etiology, n (%)</b>                    |                         |                |         |
| HCV                                       | 97 (85.8)               | 16 (14.2)      |         |
| HBV                                       | 48 (92.3)               | 4 (7.7)        |         |
| Alcohol                                   | 32 (91.4)               | 3 (8.6)        |         |
| Others                                    | 36 (87.8)               | 5 (12.2)       |         |
| <b>Child-Pugh, n (%)</b>                  |                         |                |         |
| A                                         | 210 (87.9)              | 29 (12.1)      |         |
| B                                         | 5 (100.0)               | 0 (0.0)        |         |
| <b>Tumor size (cm), median (range)</b>    |                         |                |         |
|                                           | 3.2 (0.5-20.0)          | 6.0 (1.5-19.0) | p=0.011 |
| <b>Multinodularity, n (%)</b>             |                         |                |         |
| Yes                                       | 53 (85.5)               | 9 (14.5)       |         |
| No                                        | 162 (89.0)              | 20 (11.0)      |         |
| <b>Vascular invasion, n (%)</b>           |                         |                |         |
| Macrovascular                             | 7 (58.3)                | 5 (41.7)       | p=0.007 |
| Microvascular                             | 61 (83.6)               | 12 (16.4)      |         |
| No                                        | 146 (92.4)              | 12 (7.6)       |         |
| <b>Satellites, n (%)</b>                  |                         |                |         |
| Yes                                       | 57 (81.4)               | 13 (18.6)      | p=0.050 |
| No                                        | 158 (90.8)              | 16 (9.2)       |         |
| <b>Histological grade, n (%)</b>          |                         |                |         |
| Well differentiated (G1)                  | 35 (97.2)               | 1 (2.8)        | p<0.001 |
| Moderately differentiated (G2)            | 109 (94.8)              | 6 (5.2)        |         |
| Poorly differentiated (G3)                | 33 (67.3)               | 16 (32.7)      |         |
| <b>BCLC stage, n (%)</b>                  |                         |                |         |
| Very early (0)                            | 19 (95.0)               | 1 (5.0)        | p=0.001 |
| Early (A)                                 | 174 (90.6)              | 18 (9.4)       |         |
| Intermediate (B)                          | 14 (73.7)               | 5 (26.3)       |         |
| Advanced (C)                              | 7 (58.3)                | 5 (41.7)       |         |
| <b>Bilirubin (mg/dl), median (range)</b>  |                         |                |         |
|                                           | 1.0 (0.3-4.7)           | 0.9 (0.4-2.3)  |         |
| <b>Albumin (g/dl), median (range)</b>     |                         |                |         |
|                                           | 4.1 (2.4-5.5)           | 4.0 (3.2-4.7)  |         |
| <b>Platelets (giga/l), median (range)</b> |                         |                |         |
|                                           | 153 (33-493)            | 166 (57-348)   |         |

**Missing data:** etiology (n=3), tumor size (n=1), vascular invasion (n=1), histological grade (n=44), BCLC stage (n=1), bilirubin and albumin (n=2).

Supplementary Table 2. Baseline characteristics of patients according to AFP levels (TCGA).

|                                                               | AFP serum concentration |                   |         |
|---------------------------------------------------------------|-------------------------|-------------------|---------|
|                                                               | ≤400ng/ml<br>n=213      | >400ng/ml<br>n=63 |         |
| <b>Race, n (%)</b>                                            |                         |                   |         |
| White                                                         | 105 (78.4)              | 29 (21.6)         |         |
| Asian                                                         | 91 (74.0)               | 32 (26.0)         |         |
| Black or African American                                     | 9 (81.8)                | 2 (18.2)          |         |
| American Indian or Alaska Native                              | 1 (100.0)               | 0 (0.0)           |         |
| <b>Gender, n (%)</b>                                          |                         |                   |         |
| Male                                                          | 151 (81.6)              | 34 (18.4)         | p=0.015 |
| Female                                                        | 62 (68.1)               | 29 (31.9)         |         |
| <b>Age (years), median (range)</b>                            | 62 (17-84)              | 56 (16-85)        | p=0.023 |
| <b>Risk factors, n (%)*</b>                                   |                         |                   |         |
| HCV                                                           | 38 (84.4)               | 7 (15.6)          |         |
| HBV                                                           | 74 (72.5)               | 28 (27.5)         |         |
| Alcohol                                                       | 67 (80.7)               | 16 (19.3)         |         |
| Others                                                        | 28 (87.5)               | 4 (12.5)          |         |
| <b>Child-Pugh, n (%)</b>                                      |                         |                   |         |
| A                                                             | 158 (80.2)              | 39 (19.8)         |         |
| B                                                             | 13 (72.2)               | 5 (27.8)          |         |
| C                                                             | 1 (100.0)               | 0 (0.0)           |         |
| <b>Vascular invasion, n (%)</b>                               |                         |                   |         |
| Macrovascular                                                 | 9 (69.2)                | 4 (30.8)          | p=0.043 |
| Microvascular                                                 | 52 (69.3)               | 23 (30.7)         |         |
| No                                                            | 136 (81.0)              | 32 (19.0)         |         |
| <b>Residual tumor, n (%)</b>                                  |                         |                   |         |
| R0                                                            | 198 (77.6)              | 57 (22.4)         |         |
| R1                                                            | 8 (72.7)                | 3 (27.3)          |         |
| R2                                                            | 0 (0.0)                 | 1 (100.0)         |         |
| RX                                                            | 5 (71.4)                | 2 (28.6)          |         |
| <b>Histological grade, n (%)</b>                              |                         |                   |         |
| Well differentiated (G1)                                      | 27 (87.1)               | 4 (12.9)          | p<0.001 |
| Moderately differentiated (G2)                                | 111 (86.0)              | 18 (14.0)         |         |
| Poorly differentiated (G3)                                    | 69 (67.0)               | 34 (33.0)         |         |
| Undifferentiated (G4)                                         | 5 (41.7)                | 7 (58.3)          |         |
| <b>Primary tumor (T) AJCC TNM stage 7th ed., n (%)</b>        |                         |                   |         |
| T1                                                            | 125 (81.2)              | 29 (18.8)         | p=0.045 |
| T2                                                            | 51 (76.1)               | 16 (23.9)         |         |
| T3                                                            | 31 (66.0)               | 16 (34.0)         |         |
| T4                                                            | 4 (66.7)                | 2 (33.3)          |         |
| <b>Regional lymph nodes (N) AJCC TNM stage 7th ed., n (%)</b> |                         |                   |         |
| N0                                                            | 149 (76.4)              | 46 (23.6)         |         |
| N1                                                            | 1 (50.0)                | 1 (50.0)          |         |
| NX                                                            | 62 (79.5)               | 16 (20.5)         |         |
| <b>Distant metastasis (M) AJCC TNM stage 7th ed., n (%)</b>   |                         |                   |         |
| M0                                                            | 156 (77.2)              | 46 (22.8)         |         |
| M1                                                            | 1 (25.0)                | 3 (75.0)          |         |
| MX                                                            | 56 (80.0)               | 14 (20.0)         |         |
| <b>Bilirubin (mg/dl), median (range)</b>                      | 1.2 (0.8-1.9)           | 1.2 (1.0-2.0)     |         |
| <b>Albumin (g/dl), median (range)</b>                         | 4.0 (2.0-6.9)           | 4.0 (2.0-6.0)     |         |
| <b>Platelets (giga/l), median (range)</b>                     | 193 (68-602)            | 209 (98-608)      | p=0.041 |

Missing data: race (n=7), risk factors (n=69), Child-Pugh (n=60), vascular invasion (n=20), residual tumor (n=2), primary tumor (n=2), regional lymph nodes (n=1), bilirubin (n=11), albumin (n=16), platelets (n=11).

\*More than one possible

**Supplementary Table 3. Top genes with the highest inverse correlation between its RNA expression and AFP promoter methylation.**

| Gene            | Spearman r |       |
|-----------------|------------|-------|
|                 | HEPTROMIC  | TCGA  |
| <i>BLM</i>      | -0.42      | -0.27 |
| <i>H2AFY2</i>   | -0.40      | -0.30 |
| <i>ORC6</i>     | -0.39      | -0.19 |
| <i>TRIP13</i>   | -0.38      | -0.22 |
| <i>ARID3A</i>   | -0.38      | -0.42 |
| <i>TET1</i>     | -0.38      | -0.39 |
| <i>TUBA1B</i>   | -0.38      | -0.20 |
| <i>BEX2</i>     | -0.37      | -0.38 |
| <i>PRAME</i>    | -0.37      | -0.27 |
| <i>C10orf35</i> | -0.37      | -0.25 |
| <i>GTSE1</i>    | -0.36      | -0.26 |
| <i>TROAP</i>    | -0.36      | -0.31 |
| <i>EXO1</i>     | -0.36      | -0.21 |
| <i>ALDH18A1</i> | -0.36      | -0.26 |
| <i>PLXNA1</i>   | -0.36      | -0.07 |
| <i>PRKCD</i>    | -0.36      | -0.31 |
| <i>FANCG</i>    | -0.35      | -0.26 |
| <i>RANGRF</i>   | -0.35      | -0.25 |
| <i>LRRC1</i>    | -0.35      | -0.29 |
| <i>TPX2</i>     | -0.35      | -0.24 |
| <i>POLD1</i>    | -0.35      | -0.25 |
| <i>NUP93</i>    | -0.35      | -0.11 |
| <i>ZNF331</i>   | -0.35      | -0.38 |
| <i>H2AFY</i>    | -0.35      | -0.10 |
| <i>LIG1</i>     | -0.35      | -0.24 |
| <i>CABLES2</i>  | -0.35      | -0.09 |
| <i>RPA1</i>     | -0.35      | -0.09 |
| <i>SULT1C2</i>  | -0.34      | -0.27 |
| <i>CEP55</i>    | -0.34      | -0.23 |
| <i>CSNK1E</i>   | -0.34      | -0.19 |
| <i>MAGED1</i>   | -0.34      | -0.25 |
| <i>CDCA2</i>    | -0.34      | -0.22 |
| <i>CENPM</i>    | -0.34      | -0.21 |
| <i>MCM7</i>     | -0.34      | -0.21 |
| <i>CHML</i>     | -0.34      | -0.18 |
| <i>PAFAH1B3</i> | -0.33      | -0.23 |
| <i>FAM110A</i>  | -0.33      | -0.20 |
| <i>E2F1</i>     | -0.33      | -0.18 |
| <i>MAPK3</i>    | -0.33      | -0.15 |
| <i>LMNB2</i>    | -0.33      | -0.19 |
| <i>DAZAP1</i>   | -0.33      | -0.28 |
| <i>TCF3</i>     | -0.33      | -0.23 |
| <i>SFI1</i>     | -0.33      | -0.27 |
| <i>DTL</i>      | -0.33      | -0.18 |
| <i>DUSP9</i>    | -0.33      | -0.32 |
| <i>MAPK13</i>   | -0.33      | -0.23 |
| <i>KNTC1</i>    | -0.32      | -0.19 |
| <i>GEMIN7</i>   | -0.32      | -0.28 |
| <i>IGF2BP2</i>  | -0.32      | -0.33 |
| <i>TMED3</i>    | -0.32      | -0.23 |

**Note:** Top 50 genes (HEPTROMIC) in which their expression is inversely correlated with AFP promoter methylation ( $p < 0.05$ ).

Supplementary Table 4. Protein coding genes with significantly more/less non-silent mutations depending on AFP.

| Gene           | AFP high TCGA/HEPTROMIC |      |       | AFP low TCGA/HEPTROMIC |        |       | p value | Intogen    |                         |
|----------------|-------------------------|------|-------|------------------------|--------|-------|---------|------------|-------------------------|
|                | N mut                   | N wt | % mut | N mut                  | N wt   | % mut |         | Driver     | Mode of action          |
| ATP10D         | 4/0                     | 58/9 | 5.6   | 0/0                    | 211/40 | 0.0   | 0.002   | No         |                         |
| VPS13D         | 4/0                     | 58/9 | 5.6   | 1/0                    | 210/40 | 0.4   | 0.009   | No         |                         |
| <b>BAP1</b>    | 5/1                     | 57/8 | 8.5   | 4/0                    | 207/40 | 1.6   | 0.009   | <b>Yes</b> | <b>Loss of function</b> |
| SPAG17         | 6/0                     | 56/9 | 8.5   | 3/1                    | 208/39 | 1.6   | 0.009   | No         |                         |
| <b>CTNNB1*</b> | 9/1                     | 53/8 | 14.1  | 64/11                  | 147/29 | 29.9  | 0.009   | <b>Yes</b> | <b>Activating</b>       |
| ABCB6          | 3/0                     | 59/9 | 4.2   | 0/0                    | 211/40 | 0.0   | 0.010   | No         |                         |
| CBX4           | 3/0                     | 59/9 | 4.2   | 0/0                    | 211/40 | 0.0   | 0.010   | No         |                         |
| CYP2E1         | 3/0                     | 59/9 | 4.2   | 0/0                    | 211/40 | 0.0   | 0.010   | No         |                         |
| DOCK5          | 3/0                     | 59/9 | 4.2   | 0/0                    | 211/40 | 0.0   | 0.010   | No         |                         |
| GLS            | 3/0                     | 59/9 | 4.2   | 0/0                    | 211/40 | 0.0   | 0.010   | No         |                         |
| KDM3A          | 3/0                     | 59/9 | 4.2   | 0/0                    | 211/40 | 0.0   | 0.010   | No         |                         |
| LARGE          | 3/0                     | 59/9 | 4.2   | 0/0                    | 211/40 | 0.0   | 0.010   | No         |                         |
| MCCC1          | 3/0                     | 59/9 | 4.2   | 0/0                    | 211/40 | 0.0   | 0.010   | No         |                         |
| OGFR           | 3/0                     | 59/9 | 4.2   | 0/0                    | 211/40 | 0.0   | 0.010   | No         |                         |
| OPA1           | 3/0                     | 59/9 | 4.2   | 0/0                    | 211/40 | 0.0   | 0.010   | No         |                         |
| RHO            | 3/0                     | 59/9 | 4.2   | 0/0                    | 211/40 | 0.0   | 0.010   | No         |                         |
| SIM1           | 3/0                     | 59/9 | 4.2   | 0/0                    | 211/40 | 0.0   | 0.010   | No         |                         |
| SLC22A15       | 3/0                     | 59/9 | 4.2   | 0/0                    | 211/40 | 0.0   | 0.010   | No         |                         |
| ELTD1          | 5/0                     | 57/9 | 7.0   | 3/0                    | 208/40 | 1.2   | 0.015   | No         |                         |
| MMP16          | 3/1                     | 59/8 | 5.6   | 1/1                    | 210/39 | 0.8   | 0.023   | No         |                         |
| CLCA2          | 4/0                     | 58/9 | 5.6   | 2/0                    | 209/40 | 0.8   | 0.023   | No         |                         |
| CRB1           | 4/0                     | 58/9 | 5.6   | 2/0                    | 209/40 | 0.8   | 0.023   | No         |                         |
| DMBT1          | 4/0                     | 58/9 | 5.6   | 2/0                    | 209/40 | 0.8   | 0.023   | No         |                         |
| DSP            | 4/0                     | 58/9 | 5.6   | 2/0                    | 209/40 | 0.8   | 0.023   | No         |                         |
| EML5           | 4/0                     | 58/9 | 5.6   | 2/0                    | 209/40 | 0.8   | 0.023   | No         |                         |
| IGSF10         | 4/0                     | 58/9 | 5.6   | 2/0                    | 209/40 | 0.8   | 0.023   | No         |                         |
| SEMA3E         | 4/0                     | 58/9 | 5.6   | 2/0                    | 209/40 | 0.8   | 0.023   | No         |                         |
| SRRM2          | 4/0                     | 58/9 | 5.6   | 2/0                    | 209/40 | 0.8   | 0.023   | No         |                         |
| TMPRSS15       | 4/0                     | 58/9 | 5.6   | 2/1                    | 209/39 | 1.2   | 0.023   | No         |                         |
| LRP1B          | 9/0                     | 53/9 | 12.7  | 12/0                   | 199/40 | 4.8   | 0.027   | No         |                         |
| ACE            | 3/0                     | 59/9 | 4.2   | 0/1                    | 211/39 | 0.4   | 0.035   | No         |                         |
| ANKMY1         | 3/0                     | 59/9 | 4.2   | 1/0                    | 210/40 | 0.4   | 0.035   | No         |                         |
| ANXA13         | 3/0                     | 59/9 | 4.2   | 1/0                    | 210/40 | 0.4   | 0.035   | No         |                         |
| ARID3A         | 3/0                     | 59/9 | 4.2   | 1/0                    | 210/40 | 0.4   | 0.035   | No         |                         |
| C6orf118       | 3/0                     | 59/9 | 4.2   | 1/0                    | 210/40 | 0.4   | 0.035   | No         |                         |
| CPT1A          | 3/0                     | 59/9 | 4.2   | 1/0                    | 210/40 | 0.4   | 0.035   | No         |                         |
| CYFIP1         | 3/0                     | 59/9 | 4.2   | 1/0                    | 210/40 | 0.4   | 0.035   | No         |                         |
| CYP11B1        | 3/0                     | 59/9 | 4.2   | 1/0                    | 210/40 | 0.4   | 0.035   | No         |                         |
| DOCK11         | 3/0                     | 59/9 | 4.2   | 1/0                    | 210/40 | 0.4   | 0.035   | No         |                         |
| DUOX2          | 3/0                     | 59/9 | 4.2   | 1/0                    | 210/40 | 0.4   | 0.035   | No         |                         |
| EIF3E          | 3/0                     | 59/9 | 4.2   | 1/0                    | 210/40 | 0.4   | 0.035   | No         |                         |
| KIAA2026       | 3/0                     | 59/9 | 4.2   | 1/0                    | 210/40 | 0.4   | 0.035   | No         |                         |
| LPA            | 3/0                     | 59/9 | 4.2   | 1/0                    | 210/40 | 0.4   | 0.035   | No         |                         |
| MME            | 3/0                     | 59/9 | 4.2   | 1/0                    | 210/40 | 0.4   | 0.035   | No         |                         |
| NALCN          | 3/0                     | 59/9 | 4.2   | 0/1                    | 211/39 | 0.4   | 0.035   | No         |                         |
| PCDHA8         | 3/0                     | 59/9 | 4.2   | 1/0                    | 210/40 | 0.4   | 0.035   | No         |                         |
| PHKB           | 3/0                     | 59/9 | 4.2   | 1/0                    | 210/40 | 0.4   | 0.035   | No         |                         |
| PTPRC          | 3/0                     | 59/9 | 4.2   | 1/0                    | 210/40 | 0.4   | 0.035   | No         |                         |
| RFC2           | 3/0                     | 59/9 | 4.2   | 1/0                    | 210/40 | 0.4   | 0.035   | No         |                         |
| SCYL1          | 3/0                     | 59/9 | 4.2   | 1/0                    | 210/40 | 0.4   | 0.035   | No         |                         |
| SMTN           | 3/0                     | 59/9 | 4.2   | 1/0                    | 210/40 | 0.4   | 0.035   | No         |                         |
| TAGAP          | 3/0                     | 59/9 | 4.2   | 1/0                    | 210/40 | 0.4   | 0.035   | No         |                         |
| ASCC3          | 4/0                     | 58/9 | 5.6   | 3/0                    | 208/40 | 1.2   | 0.045   | No         |                         |
| RFX7           | 4/0                     | 58/9 | 5.6   | 3/0                    | 208/40 | 1.2   | 0.045   | No         |                         |
| SUPT20HL1      | 4/0                     | 58/9 | 5.6   | 3/0                    | 208/40 | 1.2   | 0.045   | No         |                         |
| MKI67          | 5/0                     | 57/9 | 7.0   | 4/1                    | 207/39 | 2.0   | 0.046   | No         |                         |
| <b>BIRC6*</b>  | 0/0                     | 62/9 | 0.0   | 15/0                   | 196/40 | 6.0   | 0.049   | No         |                         |

Note: The first and second numbers in each cell represent patients in TCGA and HEPTROMIC, respectively.

\*Less alterations in AFP high

Supplementary Table 5. Protein coding genes differentially expressed between AFP high and low tumors (FDR<0.05 and FC>2).

| Gene            | HEPTROMIC       |              | TCGA            |              | DNA methylation                                         |
|-----------------|-----------------|--------------|-----------------|--------------|---------------------------------------------------------|
|                 | Expression (FC) | FDR          | Expression (FC) | FDR          |                                                         |
| AFP             | 11.42           | 0.006        | 51.59           | 0.001        |                                                         |
| VCX             | 11.10           | 0.009        | 6.32            | 0.004        |                                                         |
| VCX3A           | 11.10           | 0.009        | 15.46           | 0.001        |                                                         |
| VCX3B           | 11.10           | 0.009        | 20.43           | 0.009        |                                                         |
| PRAME           | 9.91            | 0.006        | 3.66            | 0.001        |                                                         |
| DUSP9           | 8.06            | 0.006        | 8.36            | 0.001        |                                                         |
| DKK1            | 7.93            | 0.009        | 6.35            | 0.001        |                                                         |
| CT45A3          | 7.25            | 0.006        | 7.76            | 0.018        |                                                         |
| SSX4            | 5.57            | 0.011        | 5.66            | 0.017        |                                                         |
| C2orf82         | 5.39            | 0.009        | 10.05           | 0.001        |                                                         |
| ARID3A          | 4.88            | 0.006        | 6.18            | 0.001        |                                                         |
| RHOXF2B         | 4.76            | 0.006        | 6.62            | 0.032        |                                                         |
| KCNQ1OT1        | 4.66            | 0.006        | 2.12            | 0.001        |                                                         |
| CTAG1B          | 4.61            | 0.025        | 6.53            | 0.001        |                                                         |
| IGF2BP2         | 4.36            | 0.006        | 4.91            | 0.001        |                                                         |
| FKBP10          | 4.32            | 0.006        | 3.73            | 0.001        |                                                         |
| CTNND2          | 4.04            | 0.006        | 2.76            | 0.001        |                                                         |
| HOXC6           | 3.92            | 0.046        | 3.09            | 0.005        |                                                         |
| IGDCC4          | 3.90            | 0.006        | 3.95            | 0.001        |                                                         |
| FXVD2           | 3.59            | 0.006        | 2.88            | 0.021        |                                                         |
| SALL4           | 3.55            | 0.006        | 5.25            | 0.001        |                                                         |
| SOBP            | 3.43            | 0.006        | 2.37            | 0.001        |                                                         |
| UBE2C           | 3.41            | 0.006        | 2.28            | 0.001        |                                                         |
| LOC645166       | 3.35            | 0.006        | 3.89            | 0.001        |                                                         |
| LOC654342       | 3.35            | 0.006        | 2.94            | 0.001        |                                                         |
| NDN             | 3.33            | 0.006        | 3.38            | 0.001        |                                                         |
| <b>IGF2</b>     | <b>3.28</b>     | <b>0.035</b> | <b>6.88</b>     | <b>0.001</b> | <b>Hypomethylated (Body;5'UTR;TSS1500)</b>              |
| IGF2BP3         | 3.17            | 0.006        | 2.24            | 0.001        |                                                         |
| LIN28B          | 3.17            | 0.006        | 3.94            | 0.001        |                                                         |
| EPPK1           | 3.09            | 0.006        | 3.24            | 0.001        |                                                         |
| NT5DC2          | 3.09            | 0.006        | 2.44            | 0.001        |                                                         |
| MEX3A           | 3.07            | 0.006        | 2.66            | 0.001        |                                                         |
| CDKN1C          | 3.01            | 0.032        | 4.32            | 0.001        |                                                         |
| PTP4A3          | 3.00            | 0.006        | 2.06            | 0.001        |                                                         |
| <b>FRAS1</b>    | <b>2.92</b>     | <b>0.006</b> | <b>4.14</b>     | <b>0.001</b> | <b>Hypermethylated (Body) / Hypomethylated (TSS200)</b> |
| NRXN3           | 2.90            | 0.050        | 4.30            | 0.001        |                                                         |
| TRNP1           | 2.84            | 0.009        | 2.75            | 0.001        |                                                         |
| CDCA7           | 2.84            | 0.006        | 2.69            | 0.001        |                                                         |
| BEX2            | 2.83            | 0.017        | 2.93            | 0.001        |                                                         |
| SLC39A4         | 2.82            | 0.006        | 3.75            | 0.001        |                                                         |
| MSI1            | 2.77            | 0.006        | 4.02            | 0.001        |                                                         |
| POTEG           | 2.76            | 0.006        | 7.76            | 0.006        |                                                         |
| C1orf186        | 2.74            | 0.034        | 3.67            | 0.003        |                                                         |
| MAGED4          | 2.74            | 0.006        | 6.50            | 0.001        |                                                         |
| MAGED4B         | 2.74            | 0.006        | 5.95            | 0.001        |                                                         |
| SPHK1           | 2.63            | 0.006        | 3.72            | 0.001        |                                                         |
| IGF2BP1         | 2.61            | 0.006        | 4.53            | 0.001        |                                                         |
| FGFR3           | 2.59            | 0.006        | 2.42            | 0.001        |                                                         |
| SNRPN           | 2.57            | 0.006        | 2.14            | 0.001        |                                                         |
| PITX2           | 2.53            | 0.006        | 8.90            | 0.004        |                                                         |
| S100A14         | 2.48            | 0.029        | 3.86            | 0.001        |                                                         |
| ETV4            | 2.47            | 0.006        | 2.45            | 0.001        |                                                         |
| PDE9A           | 2.46            | 0.006        | 3.32            | 0.001        |                                                         |
| PLBD1           | 2.44            | 0.006        | 2.16            | 0.009        |                                                         |
| DQX1            | 2.39            | 0.006        | 8.64            | 0.001        |                                                         |
| SOX12           | 2.38            | 0.006        | 2.06            | 0.001        |                                                         |
| FIGNL2          | 2.38            | 0.006        | 2.81            | 0.001        |                                                         |
| MYBL2           | 2.37            | 0.006        | 2.83            | 0.001        |                                                         |
| HOXC4           | 2.35            | 0.019        | 2.82            | 0.001        |                                                         |
| <b>PAFAH1B3</b> | <b>2.33</b>     | <b>0.006</b> | <b>2.19</b>     | <b>0.001</b> | <b>Hypomethylated (Body)</b>                            |
| CADPS           | 2.32            | 0.011        | 8.56            | 0.001        |                                                         |
| CENPM           | 2.27            | 0.011        | 2.01            | 0.001        |                                                         |
| MMP11           | 2.22            | 0.006        | 3.64            | 0.001        |                                                         |
| ZNF83           | 2.21            | 0.013        | 2.12            | 0.001        |                                                         |
| AURKB           | 2.20            | 0.006        | 2.63            | 0.001        |                                                         |
| ZNF331          | 2.20            | 0.006        | 2.01            | 0.001        |                                                         |
| CDC25A          | 2.19            | 0.006        | 2.35            | 0.001        |                                                         |
| TTL4            | 2.16            | 0.048        | 2.26            | 0.001        |                                                         |
| ZNF204P         | 2.16            | 0.013        | 2.94            | 0.001        |                                                         |
| SPINK4          | 2.14            | 0.011        | 7.70            | 0.040        |                                                         |
| WNK2            | 2.14            | 0.006        | 3.50            | 0.001        |                                                         |
| GSTP1           | 2.13            | 0.029        | 2.10            | 0.011        |                                                         |
| MEP1A           | 2.11            | 0.019        | 3.50            | 0.007        |                                                         |
| RAB42           | 2.06            | 0.017        | 2.13            | 0.001        |                                                         |
| VIL1            | 2.05            | 0.006        | 3.16            | 0.001        |                                                         |
| TRIM71          | 2.04            | 0.006        | 6.20            | 0.001        |                                                         |
| DLEU2           | 2.04            | 0.006        | 2.01            | 0.001        |                                                         |
| OCA2            | 2.03            | 0.006        | 8.02            | 0.002        |                                                         |

|               |              |              |              |              |                              |
|---------------|--------------|--------------|--------------|--------------|------------------------------|
| ITIH4         | -2.01        | 0.006        | -2.38        | 0.001        |                              |
| GSTZ1         | -2.02        | 0.020        | -2.10        | 0.001        |                              |
| FGGY          | -2.02        | 0.006        | -2.31        | 0.001        |                              |
| MTHFD1        | -2.04        | 0.009        | -2.38        | 0.001        |                              |
| SLC27A5       | -2.05        | 0.013        | -3.69        | 0.001        |                              |
| NAMPT         | -2.06        | 0.025        | -2.75        | 0.001        |                              |
| C8A           | -2.07        | 0.011        | -2.88        | 0.001        |                              |
| CYP4F11       | -2.08        | 0.013        | -2.57        | 0.001        |                              |
| C8B           | -2.08        | 0.006        | -2.11        | 0.001        |                              |
| DAO           | -2.09        | 0.013        | -2.03        | 0.001        |                              |
| ADH4          | -2.10        | 0.019        | -2.58        | 0.001        |                              |
| PCK1          | -2.11        | 0.022        | -3.38        | 0.001        |                              |
| UGT2B7        | -2.11        | 0.009        | -3.82        | 0.001        |                              |
| HPR           | -2.11        | 0.006        | -2.70        | 0.001        |                              |
| ADRB2         | -2.13        | 0.009        | -2.08        | 0.003        |                              |
| ACMSD         | -2.15        | 0.011        | -2.25        | 0.001        |                              |
| TMEM47        | -2.16        | 0.006        | -2.65        | 0.001        |                              |
| ACADL         | -2.16        | 0.006        | -3.17        | 0.001        |                              |
| AR            | -2.19        | 0.011        | -3.65        | 0.001        |                              |
| DMGDH         | -2.20        | 0.006        | -2.27        | 0.001        |                              |
| <b>CUX2</b>   | <b>-2.21</b> | <b>0.019</b> | <b>-3.51</b> | <b>0.001</b> | <b>Hypomethylated (Body)</b> |
| ACSM2A        | -2.23        | 0.006        | -2.56        | 0.001        |                              |
| FOLH1B        | -2.24        | 0.023        | -3.34        | 0.005        |                              |
| ACSM5         | -2.27        | 0.011        | -2.89        | 0.001        |                              |
| C6            | -2.29        | 0.006        | -2.70        | 0.001        |                              |
| CLDN2         | -2.30        | 0.047        | -5.07        | 0.001        |                              |
| CFHR3         | -2.33        | 0.006        | -2.60        | 0.007        |                              |
| CFHR4         | -2.33        | 0.006        | -3.15        | 0.001        |                              |
| NR1I2         | -2.37        | 0.006        | -2.34        | 0.001        |                              |
| RUNDC3B       | -2.44        | 0.006        | -3.41        | 0.001        |                              |
| PFKFB1        | -2.45        | 0.006        | -2.09        | 0.001        |                              |
| IDO2          | -2.46        | 0.048        | -8.82        | 0.001        |                              |
| SOCS2         | -2.47        | 0.006        | -2.12        | 0.002        |                              |
| CES2          | -2.50        | 0.006        | -2.52        | 0.001        |                              |
| AKR1D1        | -2.50        | 0.029        | -2.43        | 0.001        |                              |
| RTP3          | -2.51        | 0.022        | -2.36        | 0.001        |                              |
| SEC14L2       | -2.52        | 0.006        | -3.19        | 0.001        |                              |
| PON1          | -2.54        | 0.006        | -2.03        | 0.001        |                              |
| SLC1A1        | -2.54        | 0.011        | -4.46        | 0.001        |                              |
| GBA3          | -2.58        | 0.022        | -2.99        | 0.001        |                              |
| ANO1          | -2.60        | 0.040        | -2.36        | 0.002        |                              |
| <b>MOGAT1</b> | <b>-2.60</b> | <b>0.006</b> | <b>-2.79</b> | <b>0.003</b> | <b>Hypomethylated (Body)</b> |
| CA2           | -2.66        | 0.006        | -2.66        | 0.001        |                              |
| CYP8B1        | -2.66        | 0.006        | -4.09        | 0.001        |                              |
| F9            | -2.70        | 0.006        | -3.03        | 0.001        |                              |
| ABCG2         | -2.71        | 0.006        | -3.45        | 0.001        |                              |
| SLC46A3       | -2.72        | 0.006        | -3.76        | 0.001        |                              |
| FBXO2         | -2.76        | 0.026        | -2.50        | 0.002        |                              |
| GLYAT         | -2.77        | 0.019        | -4.91        | 0.001        |                              |
| AKR7A3        | -2.84        | 0.006        | -2.86        | 0.001        |                              |
| ABCB4         | -2.87        | 0.006        | -3.24        | 0.001        |                              |
| HPD           | -2.88        | 0.006        | -4.65        | 0.001        |                              |
| GLYATL1       | -2.98        | 0.006        | -3.32        | 0.001        |                              |
| CRYAA         | -2.98        | 0.006        | -2.83        | 0.004        |                              |
| HAO2          | -3.05        | 0.049        | -2.55        | 0.008        |                              |
| CFHR5         | -3.08        | 0.006        | -4.08        | 0.001        |                              |
| NAT2          | -3.11        | 0.006        | -6.36        | 0.001        |                              |
| TMEM27        | -3.15        | 0.035        | -2.80        | 0.001        |                              |
| GYS2          | -3.17        | 0.006        | -3.86        | 0.001        |                              |
| APOF          | -3.24        | 0.017        | -3.23        | 0.001        |                              |
| FNDC5         | -3.31        | 0.044        | -5.59        | 0.001        |                              |
| TTC36         | -3.38        | 0.029        | -4.37        | 0.001        |                              |
| MT1X          | -3.46        | 0.006        | -3.69        | 0.043        |                              |
| UGT2B15       | -3.49        | 0.006        | -2.99        | 0.001        |                              |
| ADH1C         | -3.63        | 0.006        | -3.51        | 0.001        |                              |
| HSD17B6       | -3.84        | 0.006        | -2.36        | 0.001        |                              |
| RDH16         | -3.84        | 0.006        | -3.80        | 0.001        |                              |
| CES1P1        | -3.89        | 0.017        | -2.20        | 0.024        |                              |
| CYP2C8        | -3.96        | 0.006        | -2.40        | 0.002        |                              |
| IGF1          | -4.13        | 0.006        | -2.13        | 0.016        |                              |
| SLC22A1       | -4.15        | 0.006        | -3.74        | 0.001        |                              |
| CNDP1         | -4.17        | 0.011        | -2.65        | 0.046        |                              |
| THRSP         | -4.25        | 0.035        | -3.25        | 0.021        |                              |
| GPLD1         | -4.25        | 0.006        | -2.21        | 0.001        |                              |
| CYP2A6        | -4.35        | 0.006        | -4.38        | 0.001        |                              |
| TAT           | -4.49        | 0.006        | -4.05        | 0.001        |                              |
| SLC10A1       | -4.67        | 0.006        | -3.50        | 0.001        |                              |
| BBOX1         | -4.94        | 0.006        | -3.72        | 0.001        |                              |
| MFSD2A        | -5.44        | 0.009        | -6.85        | 0.001        |                              |
| ALDH3A1       | -6.01        | 0.040        | -10.78       | 0.001        |                              |

Note: In bold those genes with a significant differential methylation status ( $p < 0.05$ ,  $\Delta\text{Beta} > 0.20$ ) when comparing both subgroups.

# Supplementary Figure 1

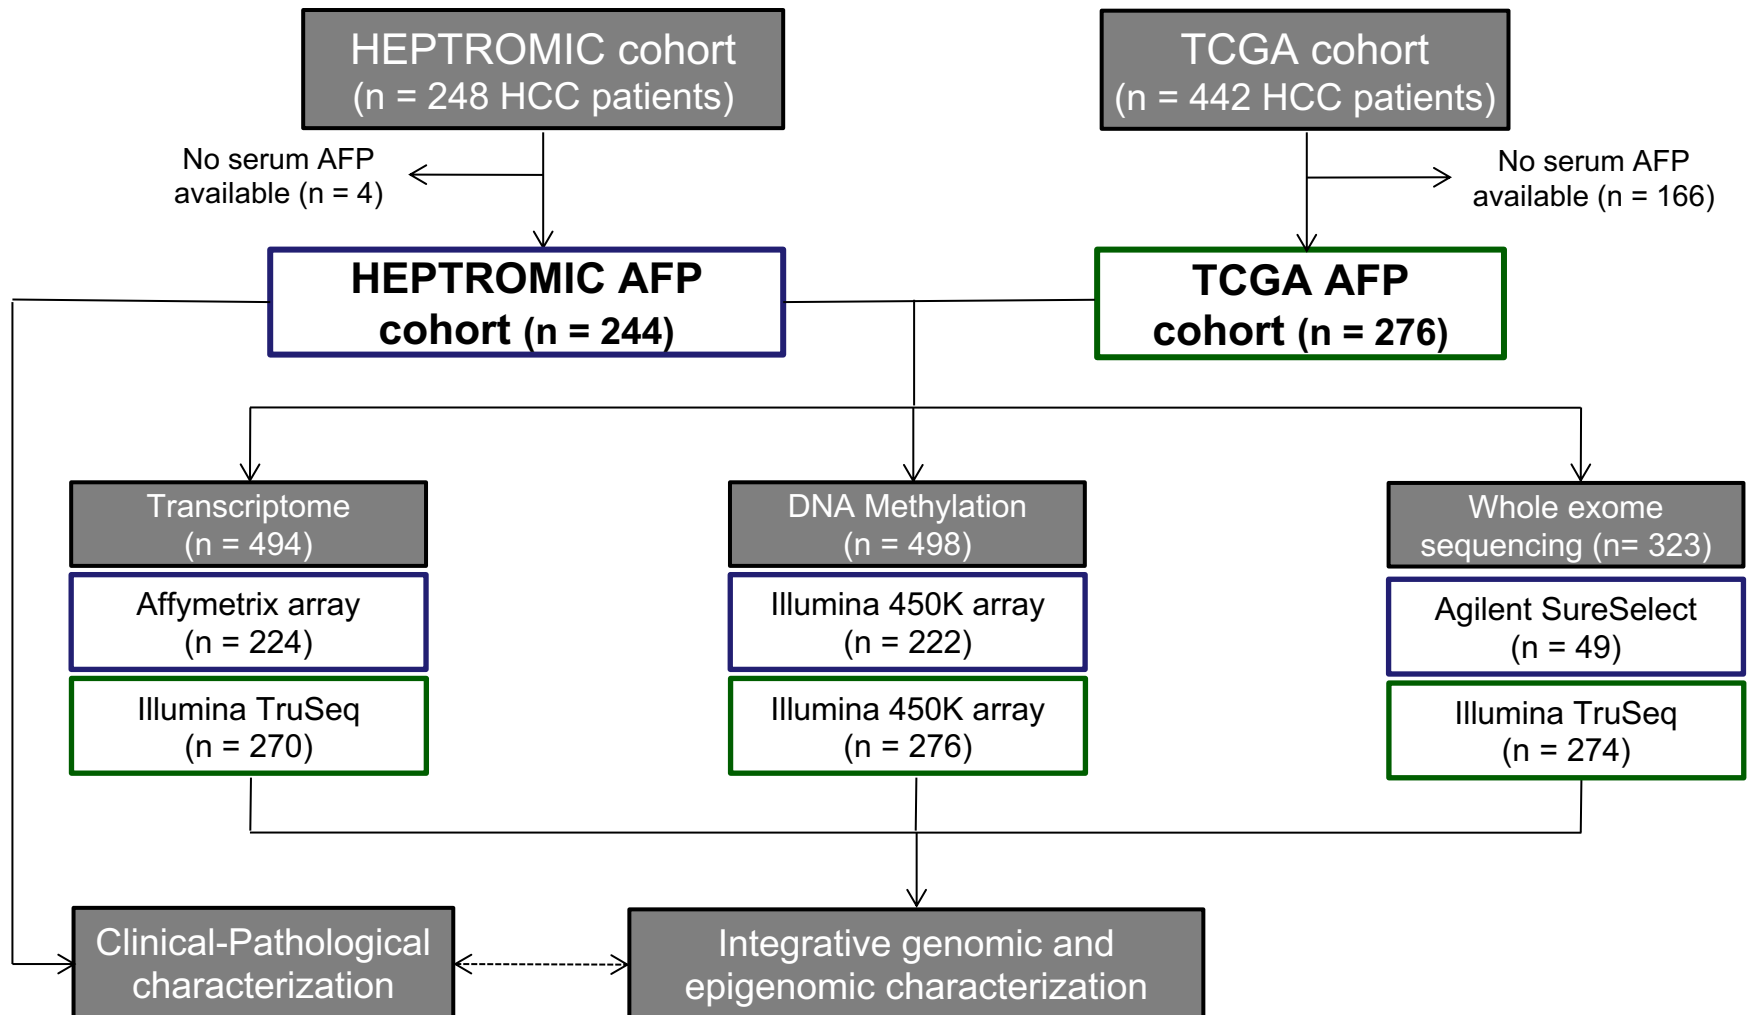



## Supplementary Figure 2

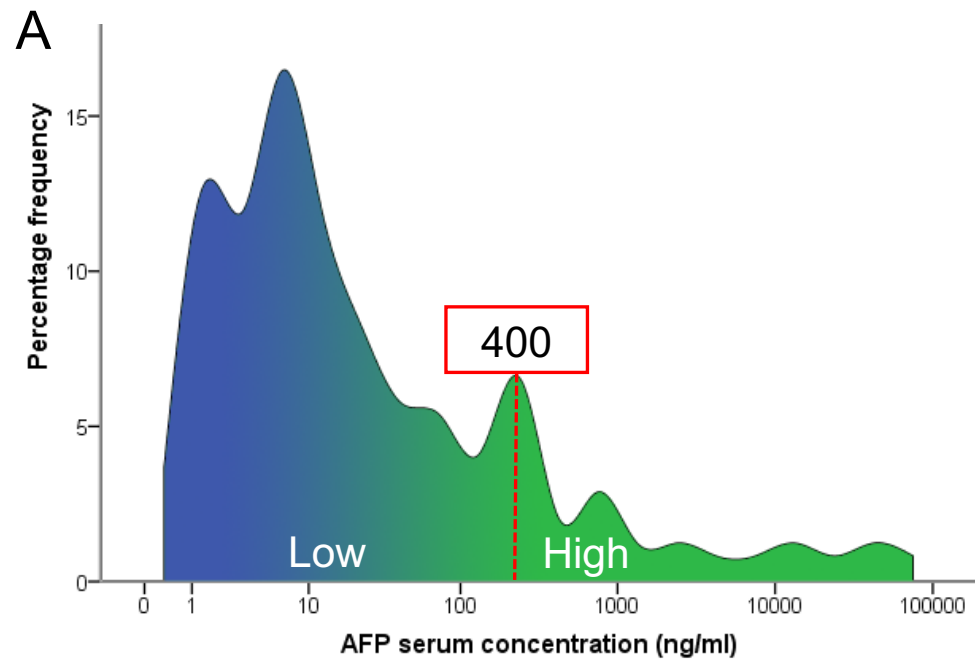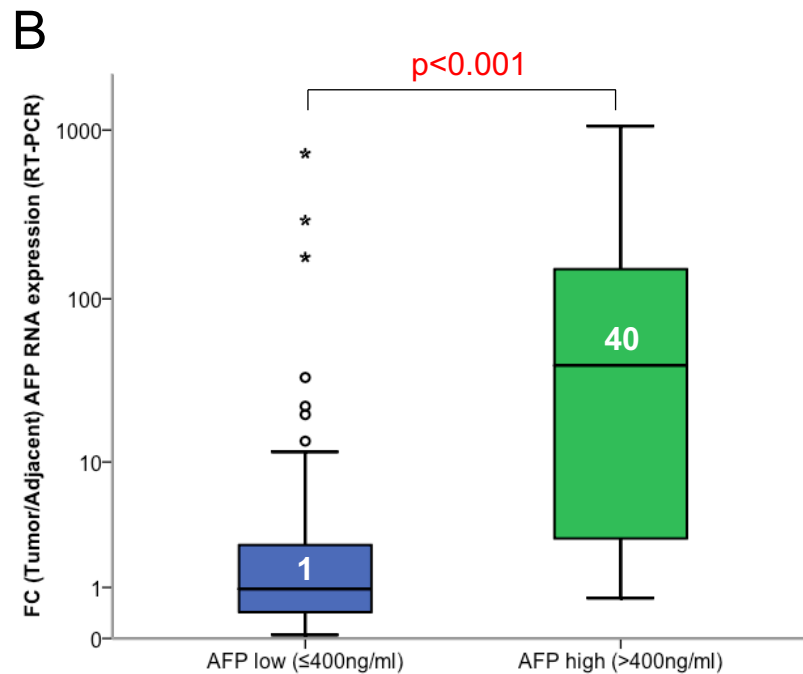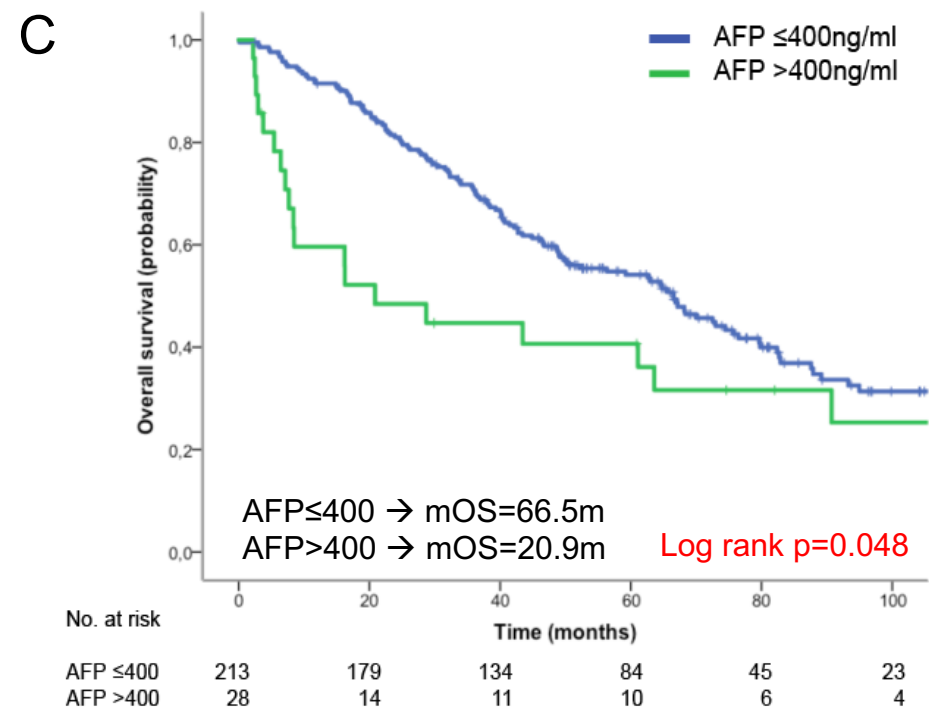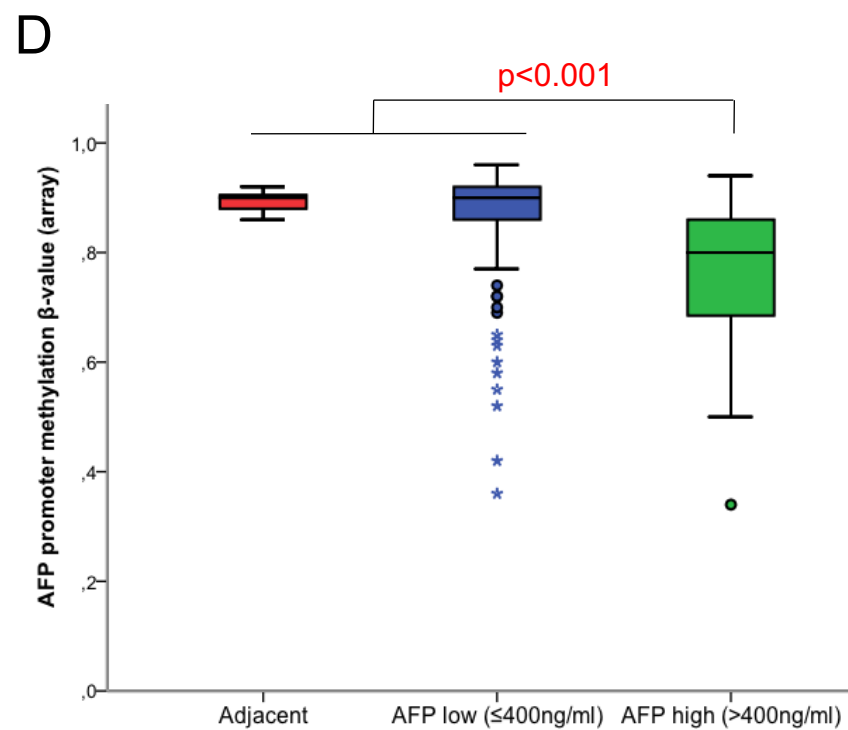

# Supplementary Figure 3

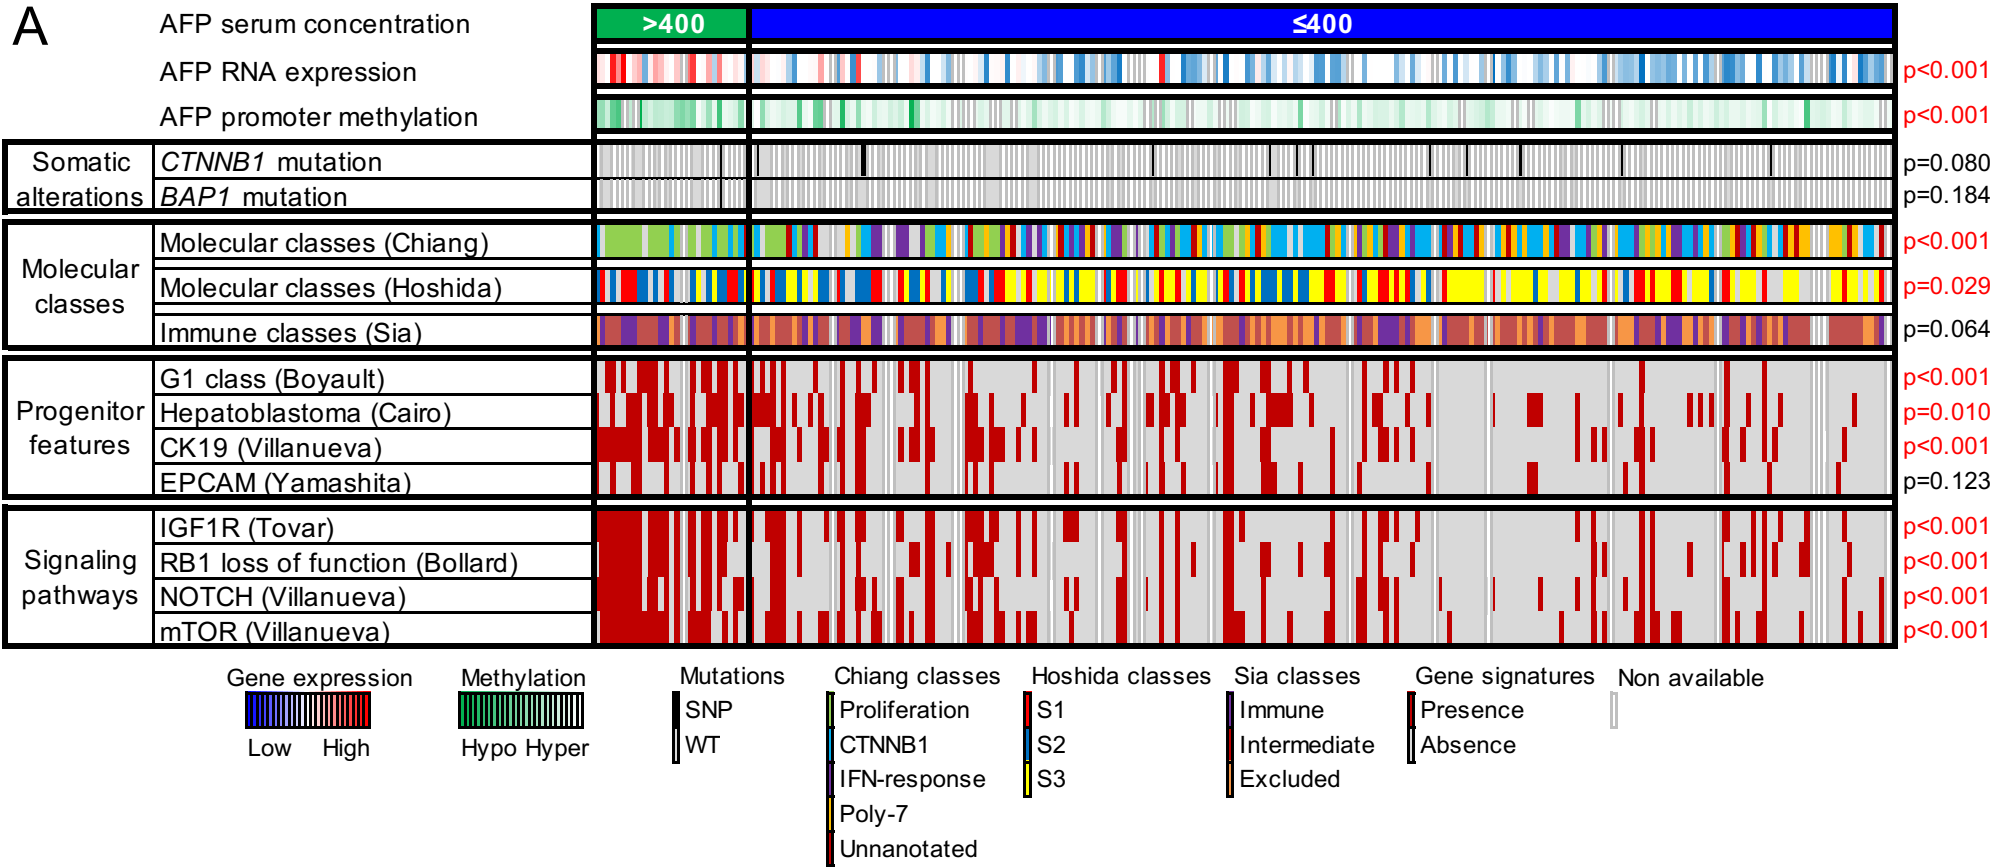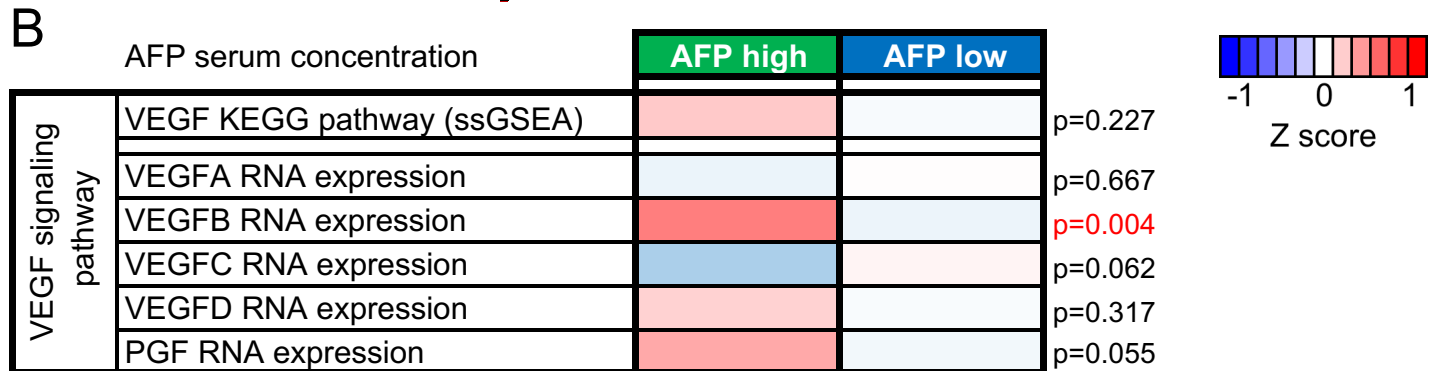

Supplement: 41416_2019_513_MOESM1_ESM.pdf [file 41416_2019_513_MOESM1_ESM.pdf]
